# Supplementary material
Source: PubMed Central journal article supplement (PMC7162012)
Supplement: CBDD-89-74-s001.pdf [file CBDD-89-74-s001.pdf]

## **AVCpred: An integrated web server for prediction and design of antiviral compounds**

**Abid Qureshi , Gazaldeep Kaur and Manoj Kumar\***

Bioinformatics Centre, Institute of Microbial Technology, Council of Scientific and Industrial Research, Sector 39-A, Chandigarh-160036, India

\*Correspondence to: Manoj Kumar (E-mail: [manojk@imtech.res.in](mailto:manojk@imtech.res.in))

### **Supplementary information**

**Table S1** Details of the AVCpred dataset used for the development of general prediction model.

**Table S1.** Details of statistical parameters used for the development of the QSAR models

**Table S3** Details of chemical descriptors used in the development of QSAR models.

**Supplementary Table S1.** Details of the AVCpred dataset used for the development of general prediction model.

| S. No. | Virus                                     | Overall data | Data filter        |            |               |
|--------|-------------------------------------------|--------------|--------------------|------------|---------------|
|        |                                           |              | Percent inhibition | Reference  | Non redundant |
| 1      | Dengue virus 1                            | 3            | 1                  | 1          | 1             |
| 2      | Dengue virus 2                            | 22           | 16                 | 16         | 16            |
| 3      | Enterovirus                               | 72           | 46                 | 46         | 30            |
| 4      | Human adenovirus 5                        | 83           | 74                 | 74         | 41            |
| 5      | Human cox B1                              | 13           | 4                  | 4          | 4             |
| 6      | Human cox B5                              | 46           | 21                 | 21         | 21            |
| 7      | Human echovirus 13                        | 3            | 3                  | 3          | 3             |
| 8      | Human echovirus 9                         | 9            | 3                  | 3          | 2             |
| 9      | Human enterovirus 71                      | 28           | 20                 | 20         | 19            |
| 10     | Human enterovirus C                       | 2            | 2                  | 2          | 1             |
| 11     | Human polio virus 1                       | 12           | 4                  | 4          | 4             |
| 12     | Human rhinovirus                          | 139          | 13                 | 2          | 1             |
| 13     | Human rhinovirus 14                       | 35           | 33                 | 33         | 29            |
| 14     | Human rhinovirus 1B                       | 52           | 40                 | 40         | 18            |
| 15     | Human rhinovirus 2                        | 2            | 2                  | 2          | 2             |
| 16     | Human T lymphotropic virus                | 47           | 45                 | 45         | 42            |
| 17     | Influenza A                               | 624          | 90                 | 52         | 36            |
| 18     | Influenza A (H1N1)                        | 37           | 16                 | 16         | 16            |
| 19     | Influenza B                               | 148          | 1                  | 1          | 1             |
| 20     | Monkeypox virus                           | 5            | 5                  | 5          | 1             |
| 21     | Respiratory syncytial virus               | 156          | 16                 | 16         | 4             |
| 22     | Rift valley fever virus (cercopithecidae) | 1            | 1                  | 1          | 1             |
| 23     | Sandfly fever sicilian virus              | 2            | 2                  | 2          | 2             |
| 24     | SARS Corornavirus                         | 77           | 61                 | 61         | 23            |
| 25     | Simian virus 40                           | 45           | 45                 | 45         | 45            |
| 26     | Sindbis virus                             | 168          | 4                  | 4          | 4             |
| 27     | Vaccinia virus                            | 170          | 12                 | 12         | 12            |
| 28     | Vaccinia virus WR                         | 23           | 22                 | 22         | 22            |
| 29     | Variola virus                             | 8            | 6                  | 6          | 1             |
| 30     | Vescicular stomatitis virus               | 451          | 126                | 126        | 63            |
| 31     | West Nile Virus                           | 53           | 26                 | 26         | 17            |
| 32     | Yellow fever virus                        | 52           | 51                 | 51         | 51            |
|        | <b>Total</b>                              | <b>2588</b>  | <b>811</b>         | <b>762</b> | <b>533</b>    |

**Supplementary Table S2.** Details of statistical parameters used for the development of the QSAR models

| S. No. | Virus                              | Training |                |       |       | Testing |                |       |       |
|--------|------------------------------------|----------|----------------|-------|-------|---------|----------------|-------|-------|
|        |                                    | R        | R <sup>2</sup> | MAE   | RMSE  | R       | R <sup>2</sup> | MAE   | RMSE  |
| 1      | Human immunodeficiency virus (HIV) | 0.72     | 0.52           | 11.24 | 16.41 | 0.63    | 0.40           | 19.23 | 27.32 |
| 2      | Hepatitis C virus (HCV)            | 0.74     | 0.55           | 10.32 | 15.64 | 0.65    | 0.42           | 17.53 | 25.14 |
| 3      | Hepatitis B virus (HBV)            | 0.66     | 0.44           | 16.45 | 24.42 | 0.61    | 0.37           | 20.14 | 29.13 |
| 4      | Human herpesvirus (HHV)            | 0.68     | 0.46           | 15.44 | 22.53 | 0.64    | 0.41           | 18.11 | 26.21 |
| 5      | General (26 viruses)               | 0.71     | 0.50           | 12.01 | 19.22 | 0.67    | 0.45           | 16.34 | 23.24 |

**R :Pearson correlation coefficient.** It is a measure of correlation between two variables. A value of 1 denotes total positive correlation, 0 is no correlation and -1 is total negative correlation.  
**R<sup>2</sup> :Coefficient of determination.** It indicates how well data fit a statistical model. An R<sup>2</sup> of 1 indicates that the model perfectly fits the data, while an R<sup>2</sup> of 0 means that the model does not fit the data at all.  
**MAE :Mean absolute error.** This measure indicates how close the predictions are to the eventual outcomes. MAEs are negatively-oriented scores, that is, lower values are better.  
**RMSE :Root-mean-square error** measures the average magnitude of the error. RMSEs are also negatively-oriented scores, that is, lower values are better.

**Supplementary Table S3.** Details of chemical descriptors used in the development of QSAR models.

| Chemical Descriptor                                                                                                                                                                                                                                                                                                                                                                                                | Type                       | Details                                                                               |
|--------------------------------------------------------------------------------------------------------------------------------------------------------------------------------------------------------------------------------------------------------------------------------------------------------------------------------------------------------------------------------------------------------------------|----------------------------|---------------------------------------------------------------------------------------|
| ATSc4                                                                                                                                                                                                                                                                                                                                                                                                              | Autocorrelation            | Centered Broto-Moreau autocorrelation                                                 |
| ATSm3                                                                                                                                                                                                                                                                                                                                                                                                              | Autocorrelation            | Broto-Moreau autocorrelation                                                          |
| BCUTc-1h                                                                                                                                                                                                                                                                                                                                                                                                           | BCUT                       | nlow highest partial charge weighted BCUTS                                            |
| BCUTp-1h                                                                                                                                                                                                                                                                                                                                                                                                           | BCUT                       | nlow highest polarizability weighted BCUTS                                            |
| EStateFP7                                                                                                                                                                                                                                                                                                                                                                                                          | sCH3                       | [CD1H3]-*                                                                             |
| ETA_EtaP_B                                                                                                                                                                                                                                                                                                                                                                                                         | Extended topochemical atom | Branching index EtaB relative to molecular size                                       |
| ExtFP112, ExtFP128, ExtFP148, ExtFP165, ExtFP188, ExtFP223, ExtFP225, ExtFP266, ExtFP266, ExtFP283, ExtFP336, ExtFP346, ExtFP346, ExtFP347, ExtFP440, ExtFP461, ExtFP505, ExtFP506, ExtFP534, ExtFP575, ExtFP581, ExtFP610, ExtFP634, ExtFP637, ExtFP65, ExtFP69, ExtFP763, ExtFP766, ExtFP8, ExtFP805, ExtFP819, ExtFP833, ExtFP840, ExtFP848, ExtFP866, ExtFP888, ExtFP919, ExtFP960, ExtFP962, ExtFP978         | Extended Fingerprinter     | Extends the Fingerprinter with additional bits describing ring features               |
| FP127, FP129, FP129, FP144, FP146, FP150, FP156, FP164, FP170, FP170, FP173, FP186, FP218, FP230, FP234, FP239, FP256, FP268, FP28, FP301, FP344, FP358, FP368, FP393, FP410, FP437, FP46, FP460, FP462, FP510, FP550, FP587, FP627, FP640, FP654, FP663, FP704, FP714, FP732, FP733, FP748, FP773, FP782, FP785, FP793, FP812, FP827, FP831, FP836, FP852, FP874, FP893, FP901, FP903, FP910, FP919, FP977, FP984 | Fingerprinter              | Path based fingerprints                                                               |
| GraphFP121, GraphFP144, GraphFP253, GraphFP278, GraphFP292, GraphFP396, GraphFP455, GraphFP506, GraphFP648, GraphFP770, GraphFP778, GraphFP796, GraphFP840, GraphFP948, GraphFP955                                                                                                                                                                                                                                 | Graph Only Fingerprinter   | Specialized version of the Fingerprinter which does not take bond orders into account |
| KRFP299                                                                                                                                                                                                                                                                                                                                                                                                            | Klekota-Roth fingerprint   | [!#1][CH2][CH](!#1)[CH3]                                                              |
| KRFP3349                                                                                                                                                                                                                                                                                                                                                                                                           |                            | CC(C)(C)c1cccc1                                                                       |
| KRFP3435                                                                                                                                                                                                                                                                                                                                                                                                           |                            | CC(O)CN(C)C                                                                           |
| KRFP3520                                                                                                                                                                                                                                                                                                                                                                                                           |                            | Cc1cc(O)cc(O)c1                                                                       |
| KRFP366                                                                                                                                                                                                                                                                                                                                                                                                            |                            | [!#1][CH2][CH2][CH2][NH2]                                                             |
| KRFP3697                                                                                                                                                                                                                                                                                                                                                                                                           |                            | CCCC(=O)O                                                                             |
| KRFP3744                                                                                                                                                                                                                                                                                                                                                                                                           |                            | CCCO                                                                                  |
| KRFP3764                                                                                                                                                                                                                                                                                                                                                                                                           |                            | CCN(CC)CCNC=O                                                                         |



|           |                                |                                                                                           |
|-----------|--------------------------------|-------------------------------------------------------------------------------------------|
|           | fingerprint                    | #8X2][#6;!\$(C=[O,N,S])]                                                                  |
| SubFP90   | Substructure fingerprint count | [CX3;\$([R0][#6]),\$([H1R0])](=[OX1])[SX2][#6;\$!(C=[O,N,S])]                             |
| SubFPC295 |                                | [#6]~[#7,#8,#16]                                                                          |
| SubFPC300 | Chi chain                      | [\$([#7X2,OX1,SX1]=*!H0;!\$([a;!n])),\$([#7X3,OX2,SX2;!H0]*=*),\$([#7X3,OX2,SX2;!H0]*:n)] |
| VCH-6     |                                | Valence chain, order 6                                                                    |
| WPOL      | Wiener numbers                 | Weiner polarity number                                                                    |
| WTPT-4    | Weighted path                  | Sum of path lengths starting from oxygens                                                 |
